# Supplementary material
Source: Springer Nature journal article supplement (https://www.springermedizin.de/resource/supplementary/12891_2010_1165_MOESM7_ESM.pdf/9507214)

**Std. Mean Difference  
IV, Fixed, 95% CI**

**Study or Subgroup**

|               |                      |
|---------------|----------------------|
| Eversden 2007 | -0.08 [-0.51, 0.34]  |
| Foley 2003    | -0.54 [-1.02, -0.07] |
| Fransen 2007  | 0.08 [-0.29, 0.45]   |
| Gill 2009     | -0.26 [-0.75, 0.22]  |
| Hall 1996     | 0.07 [-0.40, 0.55]   |
| Lund 2008     | -0.12 [-0.66, 0.43]  |
| Silva 2008    | 0.45 [-0.05, 0.94]   |
| Smith 1998    | -0.76 [-1.68, 0.16]  |
| Suomi 2003    | 0.09 [-0.79, 0.96]   |

**Total (95% CI)**                      **-0.07 [-0.24, 0.10]**

Heterogeneity:  $\text{Chi}^2 = 11.86$ ,  $\text{df} = 8$  ( $P = 0.16$ );  $I^2 = 33\%$

Test for overall effect:  $Z = 0.80$  ( $P = 0.43$ )

**Std. Mean Difference  
IV, Fixed, 95% CI**

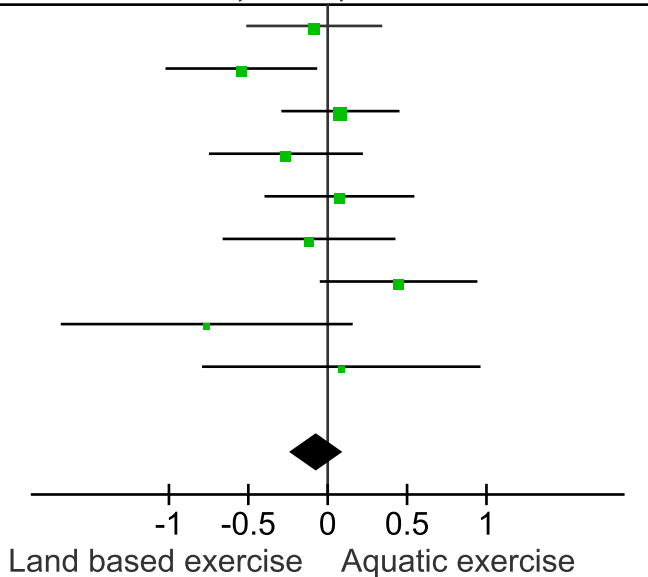

Supplement: MOESM7 [file 9507214]
